# Supplementary material for: In vitro and in vivo screening for novel essential cell-envelope proteins in Pseudomonas aeruginosa
Source: PubMed Central journal article supplement (PMC4665194; doi:10.1038/srep17593), 2015-12-01
Supplement: srep17593-s1.pdf [file srep17593-s1.pdf]

## SUPPLEMENTARY INFORMATION

### *In vitro* and *in vivo* screening for novel essential cell-envelope proteins in *Pseudomonas aeruginosa*

Regina Fernández-Piñar, Alessandra Lo Sciuto, Alice Rossi, Serena Ranucci, Alessandra Bragonzi, and Francesco Imperi

**Table S1.** Plasmids used in this study.

| Plasmid                                            | Description                                                                                                                                       | Reference/source |
|----------------------------------------------------|---------------------------------------------------------------------------------------------------------------------------------------------------|------------------|
| pBluescript II KS+                                 | Cloning vector; ColE1 replicon; Ap <sup>R</sup>                                                                                                   | Stratagene       |
| pDM4                                               | Suicide vector; <i>sacBR</i> , <i>oriR6K</i> ; Cm <sup>R</sup>                                                                                    | 38               |
| pDM4ΔPA0517                                        | pDM4 derivative for PA0517 in-frame deletion                                                                                                      | This study       |
| pDM4ΔPA1645                                        | pDM4 derivative for PA1645 in-frame deletion                                                                                                      | This study       |
| pDM4ΔPA1981                                        | pDM4 derivative for PA1981 in-frame deletion                                                                                                      | This study       |
| pDM4ΔPA2614                                        | pDM4 derivative for PA2614 ( <i>lola</i> ) in-frame deletion                                                                                      | This study       |
| pDM4ΔPA3786                                        | pDM4 derivative for PA3786 in-frame deletion                                                                                                      | This study       |
| pDM4ΔPA4460                                        | pDM4 derivative for PA4460 ( <i>lptH</i> ) in-frame deletion                                                                                      | This study       |
| pDM4ΔPA4485                                        | pDM4 derivative for PA4485 in-frame deletion                                                                                                      | This study       |
| pDM4ΔPA5126                                        | pDM4 derivative for PA5126 in-frame deletion                                                                                                      | This study       |
| mini-CTX1                                          | Self-proficient integration vector with <i>tet</i> , $\Omega$ - <i>FRT-attP</i> -MCS, <i>ori</i> , <i>int</i> , and <i>oriT</i> ; Tc <sup>R</sup> | 43               |
| mini-CTX1- <i>araCP</i> <sub>BAD</sub> <i>tolB</i> | mini-CTX1 derivative carrying <i>araCP</i> <sub>BAD</sub> <i>tolB</i>                                                                             | 19               |
| mini-CTX1- <i>araCP</i> <sub>BAD</sub> PA2614      | mini-CTX1- <i>araCP</i> <sub>BAD</sub> <i>tolB</i> derivative in which <i>tolB</i> has been replaced with PA2614 ( <i>lola</i> )                  | This study       |
| mini-CTX1- <i>araCP</i> <sub>BAD</sub> PA4460      | mini-CTX1- <i>araCP</i> <sub>BAD</sub> <i>tolB</i> derivative in which <i>tolB</i> has been replaced with PA4460 ( <i>lptH</i> )                  | This study       |

Additional reference (not included in the main text):

43. Hoang, T. T., Kutchma, A. J., Becher, A. & Schweizer, H. P. Integration-proficient plasmids for *Pseudomonas aeruginosa*: site-specific integration and use for engineering of reporter and expression strains. *Plasmid* **43**, 59-72 (2000).

**Table S2.** Primers used in this study <sup>a</sup>

| Primer name       | Sequence (5'→3') <sup>b</sup> | Restriction site | Application                                                 |
|-------------------|-------------------------------|------------------|-------------------------------------------------------------|
| PA2614_FW         | CCCGATATCGATGCGACTGATCCGCAC   | EcoRV            | Generation of mini-CTX1- <i>araCP</i> <sub>BAD</sub> PA2614 |
| PA2614_RV         | CGGAATTCTTACTCCTGGATCACGTGC   | EcoRI            | Generation of mini-CTX1- <i>araCP</i> <sub>BAD</sub> PA2614 |
| PA2614mut_UP_FW   | CCGCTCGAGGGGGGCGCCGAACAAC     | <i>XhoI</i>      | Generation of pDM4ΔPA2614                                   |
| PA2614mut_UP_RV   | CGGGATCCCATGGCCAGGGCGGC       | <i>BamHI</i>     | Generation of pDM4ΔPA2614                                   |
| PA2614mut_DOWN_FW | CGGGATCCCTTCGACGTTCCGCCGG     | <i>BamHI</i>     | Generation of pDM4ΔPA2614                                   |
| PA2614mut_DOWN_RV | GCTCTAGACATACACGCGAGCCCG      | <i>XbaI</i>      | Generation of pDM4ΔPA2614                                   |
| PA4460_FW         | CCCAAGCTTATGAGGTTCTTAATACCCTC | HindIII          | Generation of mini-CTX1- <i>araCP</i> <sub>BAD</sub> PA4460 |
| PA4460_RV         | CGGAATTCTGGGCTTTGAGCGTTGCC    | EcoRI            | Generation of mini-CTX1- <i>araCP</i> <sub>BAD</sub> PA4460 |
| PA4460mut_UP_FW   | ACGCGTCGACTACTACTGGAACGTCGGG  | <i>SalI</i>      | Generation of pDM4ΔPA4460                                   |
| PA4460mut_UP_RV   | CGGGATCCGAGGGCGGCAGTCAG       | <i>BamHI</i>     | Generation of pDM4ΔPA4460                                   |
| PA4460mut_DOWN_FW | CGGGATCCAGTAATGGCAACGCTC      | <i>BamHI</i>     | Generation of pDM4ΔPA4460                                   |
| PA4460mut_DOWN_RV | GCTCTAGATCTGCTTGATGTGCCG      | <i>XbaI</i>      | Generation of pDM4ΔPA4460                                   |
| PA0517mut_UP_FW   | CGGCTCGAGTACAACAAGCGCGGC      | <i>XhoI</i>      | Generation of pDM4ΔPA0517                                   |
| PA0517mut_UP_RV   | CGGGATCCAAGGCGTGGCTGGCGG      | <i>BamHI</i>     | Generation of pDM4ΔPA0517                                   |
| PA0517mut_DOWN_FW | CGGGATCCCGGCTGGCTGGTGGAC      | <i>BamHI</i>     | Generation of pDM4ΔPA0517                                   |
| PA0517mut_DOWN_RV | GCTCTAGAAGTCGGCGATCCAGATC     | <i>XbaI</i>      | Generation of pDM4ΔPA0517                                   |
| PA1645mut_UP_FW   | CGGCTCGAGCACCTGCTCCACCTCG     | <i>XhoI</i>      | Generation of pDM4ΔPA1645                                   |
| PA1645mut_UP_RV   | CGGGATCCAGCAACAGCGGCAATACG    | <i>BamHI</i>     | Generation of pDM4ΔPA1645                                   |
| PA1645mut_DOWN_FW | CGGGATCCGGTCGACGAGTGCCTGC     | <i>BamHI</i>     | Generation of pDM4ΔPA1645                                   |
| PA1645mut_DOWN_RV | GCTCTAGAGGGCGCCAGCAACCTG      | <i>XbaI</i>      | Generation of pDM4ΔPA1645                                   |
| PA1981mut_UP_FW   | CCCTTCGTCGACAACATCAC          | <i>SalI</i>      | Generation of pDM4ΔPA1981                                   |
| PA1981mut_UP_RV   | CGGGATCCGGCGCCGAGCAGGG        | <i>BamHI</i>     | Generation of pDM4ΔPA1981                                   |
| PA1981mut_DOWN_FW | CGGGATCCAAGGATTGCCCGCGGG      | <i>BamHI</i>     | Generation of pDM4ΔPA1981                                   |
| PA1981mut_DOWN_RV | GCTCTAGAAGCCTTGCAGGCGGTG      | <i>XbaI</i>      | Generation of pDM4ΔPA1981                                   |
| PA3786mut_UP_FW   | CCGCTCGAGGGTGATGCGCTGCTCG     | <i>XhoI</i>      | Generation of pDM4ΔPA3786                                   |
| PA3786mut_UP_RV   | CGGGATCCAGCCAGGCCACGGGG       | <i>BamHI</i>     | Generation of pDM4ΔPA3786                                   |
| PA3786mut_DOWN_FW | CGGGATCCCTGTCGCTGACTCCTC      | <i>BamHI</i>     | Generation of pDM4ΔPA3786                                   |
| PA3786mut_DOWN_RV | GCTCTAGATTTCCACCGGCACGTCG     | <i>XbaI</i>      | Generation of pDM4ΔPA3786                                   |
| PA4485mut_UP_FW   | ACGCGTCGACTACCGTTACTTCCCC     | <i>SalI</i>      | Generation of pDM4ΔPA4485                                   |

|                   |                                   |              |                           |
|-------------------|-----------------------------------|--------------|---------------------------|
| PA4485mut_UP_RV   | <u>CGGGATCC</u> GGCGGATGGGGTGGGC  | <i>BamHI</i> | Generation of pDM4ΔPA4485 |
| PA4485mut_DOWN_FW | CGGGATCCAGCGGCGTGGCGCCG           | <i>BamHI</i> | Generation of pDM4ΔPA4485 |
| PA4485mut_DOWN_RV | GCTCTAGACCTGGTCACCGAAGAGGG        | <i>XbaI</i>  | Generation of pDM4ΔPA4485 |
| PA5126mut_UP_FW   | ACGCGTCGACGCGGTCGGTCCAG           | <i>SalI</i>  | Generation of pDM4ΔPA5126 |
| PA5126mut_UP_RV   | <u>CGGGATCC</u> GGAGCCCTGCATGTTC  | <i>BamHI</i> | Generation of pDM4ΔPA5126 |
| PA5126mut_DOWN_FW | <u>CGGGATCC</u> GACGGCCGGAATAAAAG | <i>BamHI</i> | Generation of pDM4ΔPA5126 |
| PA5126mut_DOWN_RV | GCTCTAGACCGTCCGCAGCACAGCC         | <i>XbaI</i>  | Generation of pDM4ΔPA5126 |

<sup>a</sup> All PCRs were performed using the genomic DNA of *P. aeruginosa* PAO1 as the template.

<sup>b</sup> The restriction site used for cloning is underlined in the primer sequence.

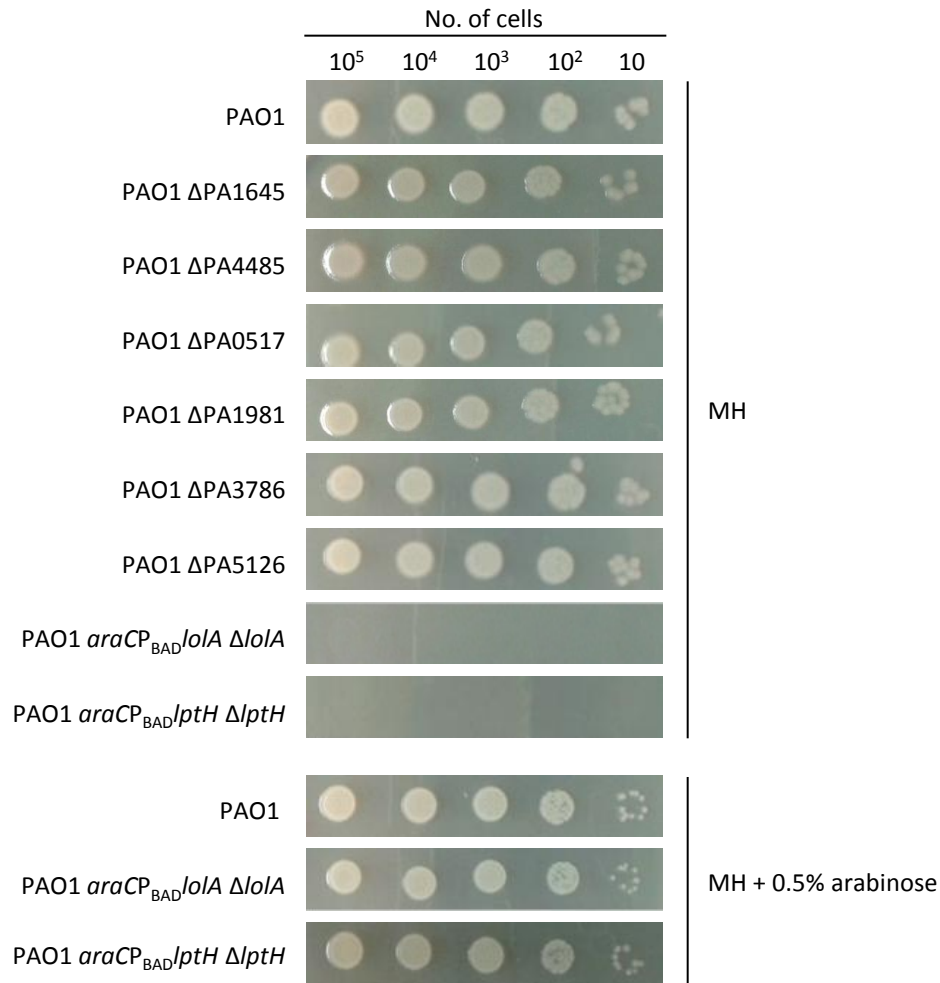

**Figure S1.** Growth of *P. aeruginosa* PAO1 and all the deletion or conditional mutants generated in this study on MH agar plates supplemented or not with 0.5% arabinose. For each strain, 5  $\mu$ l of 10-fold serial dilutions of exponential phase cultures in MH (or MH with 0.5% arabinose in the case of conditional mutants), ranging from ca. 10<sup>5</sup> to 10 viable cells, were spotted onto the plates, that were then incubated for 20 h at 37°C. The images are representative of three independent experiments giving comparable results.

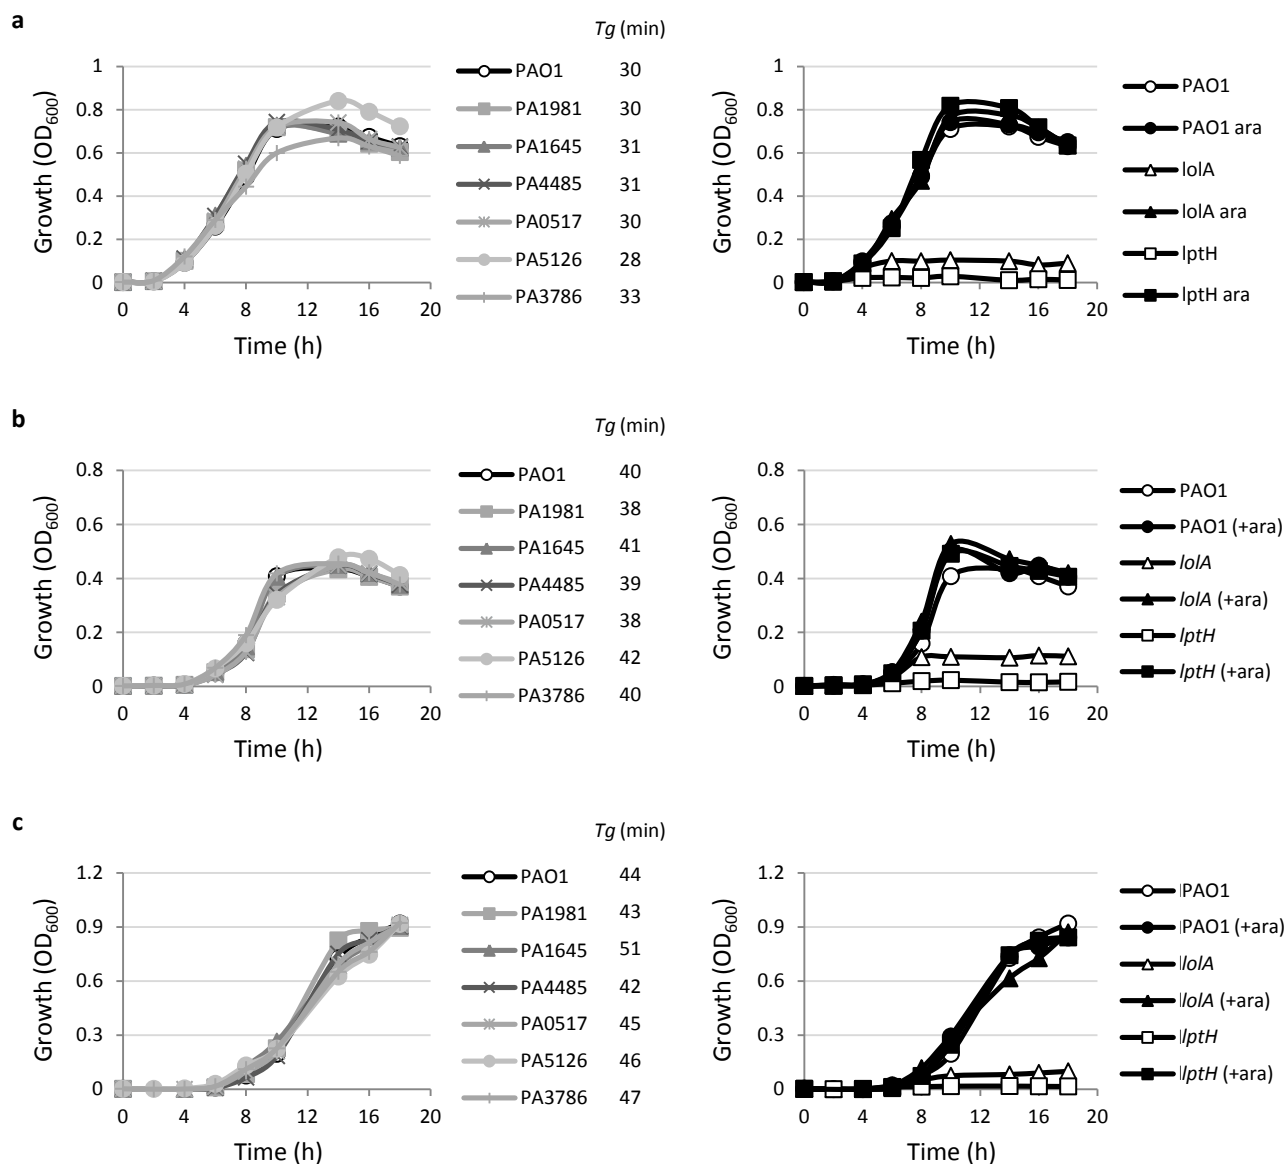

**Figure S2.** Growth curves of the wild type strain PAO1 and the PA0517, PA1645, PA1981, PA3786, PA4485 and PA5126 deletion mutants (left panels) or the *lptH* and *lolA* conditional mutants (right panels) in LB broth (a) or in M9 minimal medium supplemented with either succinate (b) or glucose (b) as carbon sources, at 37°C in microtiter plates at 200 rpm. Conditional mutants were cultured in the absence or in the presence of 0.5% arabinose (+ara). Generation times (*T<sub>g</sub>*) for the wild type strain and each deletion mutant are reported in the figure. Results are the mean of two independent experiments performed in triplicate, with standard deviations (SD) being < 11% of the values.

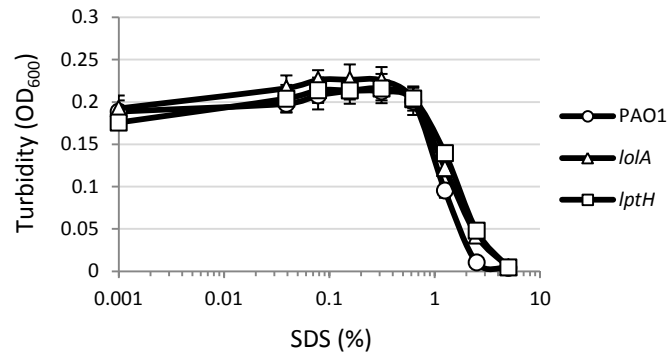

**Figure S3.** Lytic effect of different SDS concentrations (0-5%), measured as decrease in cell suspension turbidity (OD<sub>600</sub>), on the PAO1 wild type and the *lptH* and *lolA* conditional mutant grown to late-exponential phase in MH supplemented with 0.5% arabinose. Results are the mean ( $\pm$  SD) of two independent experiments performed in duplicate.

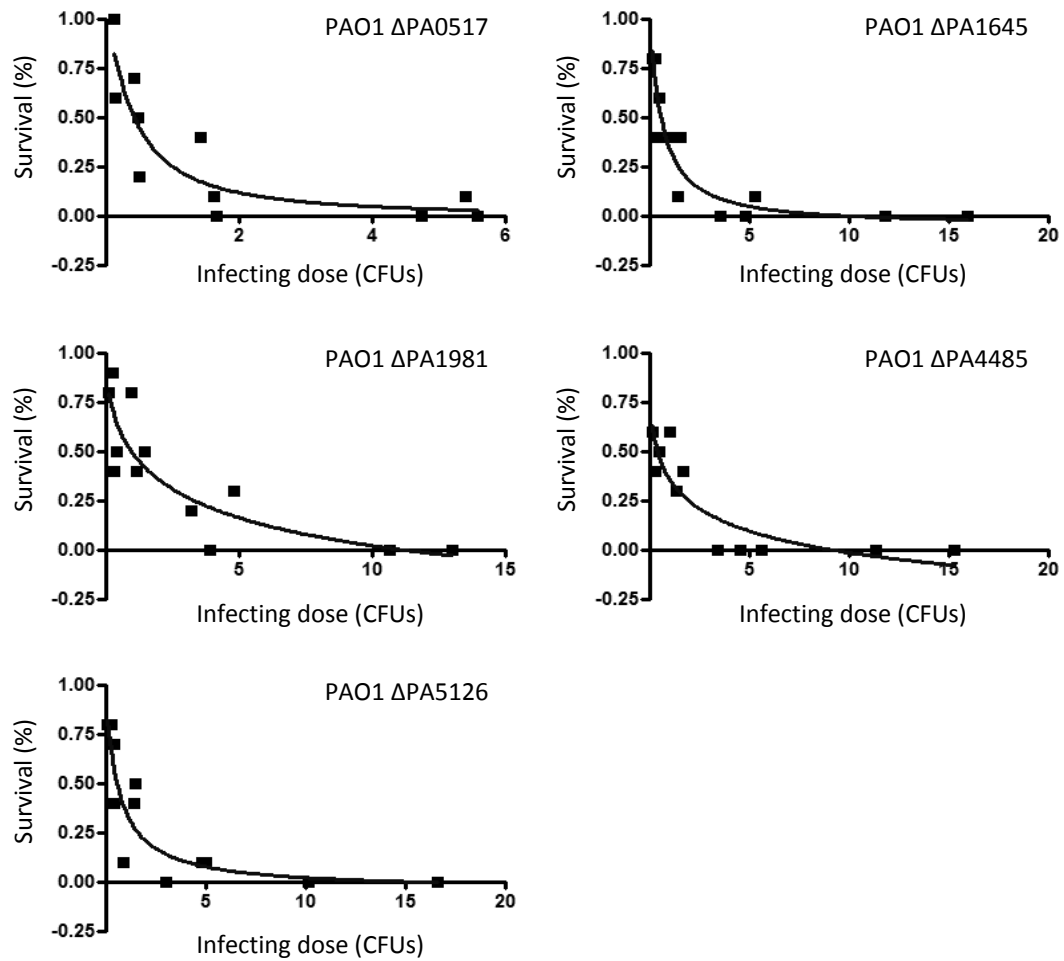

**Figure S4.** Survival curves, generated by the GraphPad Prism software, of *G. mellonella* larvae infected with different doses of the deletion mutants PAO1  $\Delta$ PA0517, PAO1  $\Delta$ PA1645, PAO1  $\Delta$ PA1981, PAO1  $\Delta$ PA4485 and PAO1  $\Delta$ PA5126.

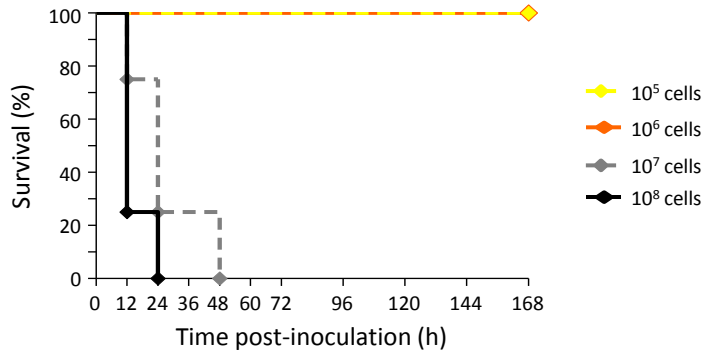

**Figure S5.** Mortality curves for mice (n = 4) infected with 10<sup>5</sup>, 10<sup>6</sup>, 10<sup>7</sup> or 10<sup>8</sup> cells of the wild type strain *P. aeruginosa* PAO1.



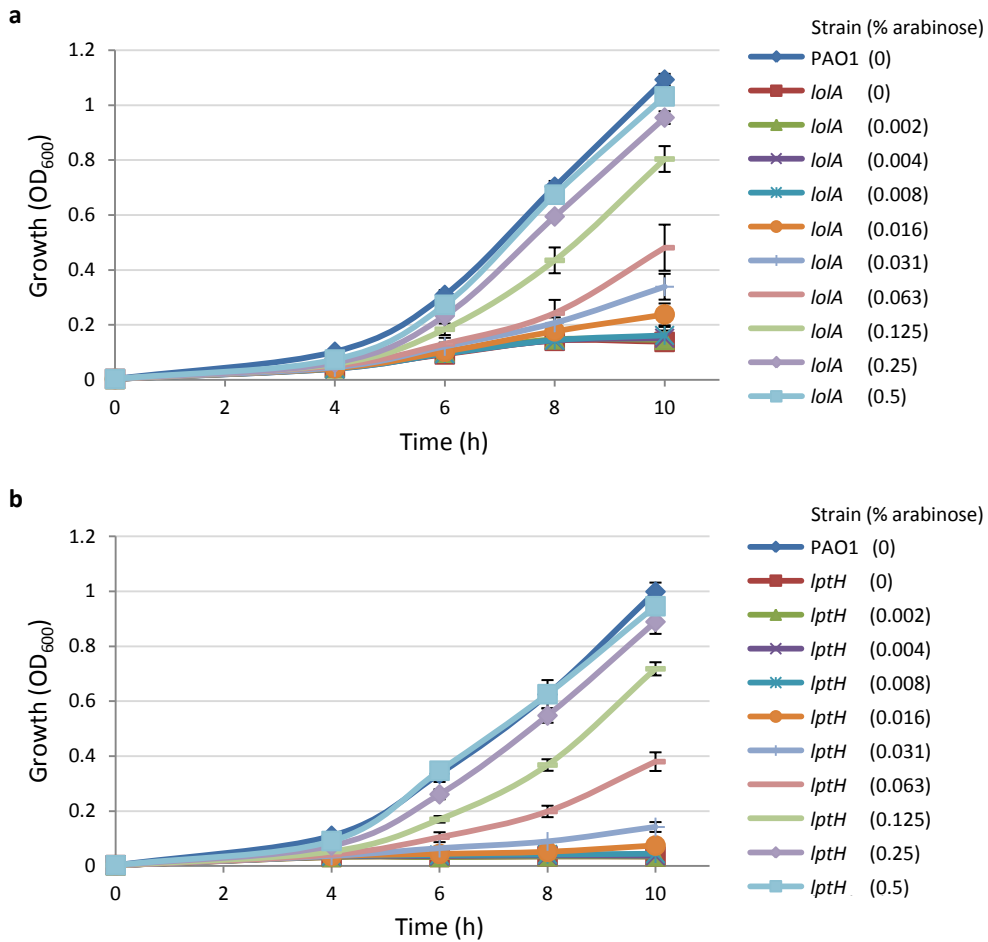

**Figure S6.** Growth of PAO1 and (a) the *lola* conditional mutant or (b) the *lptH* conditional mutant in microtiter plates at 200 rpm in MH broth supplemented with increasing concentrations of arabinose (0-0.5%) after 14 h at 37°C. Results are the mean ( $\pm$  SD) of two independent experiments performed in duplicate.
